# Supplementary material
Source: PubMed Central journal article supplement (PMC4119047)
Supplement: supp_pp.114.243360_243360Supplemental_Material.pdf [file supp_pp.114.243360_243360Supplemental_Material.pdf]

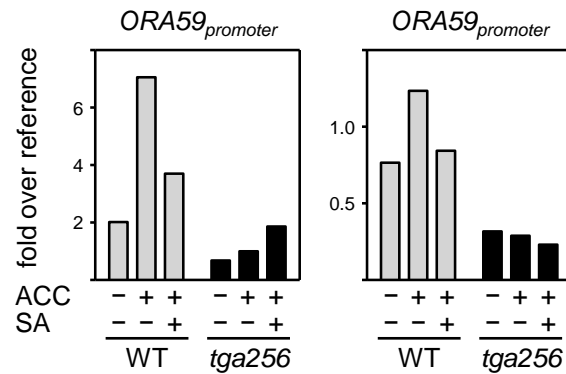

**Supplemental Figure S1.** Chromatin immunoprecipitation analysis of TGA binding to the *ORA59* promoter

Four-week old soil-grown wild-type (WT) and *tga256* mutant plants were treated with water, 1 mM ACC, or 1 mM ACC/1 mM SA for 24 h. Ten plants were combined per treatment and experiment. Chromatin samples were subjected to immunoprecipitation using the  $\alpha$ TGA2,5 antiserum. The co-immunoprecipitated DNA was recovered and *ORA59* promoter fragments were amplified with quantitative PCR using the primer pair indicated in Figure 5. A genomic fragment of *ACTIN8* was used as a reference. Results of two independent experiments are shown.

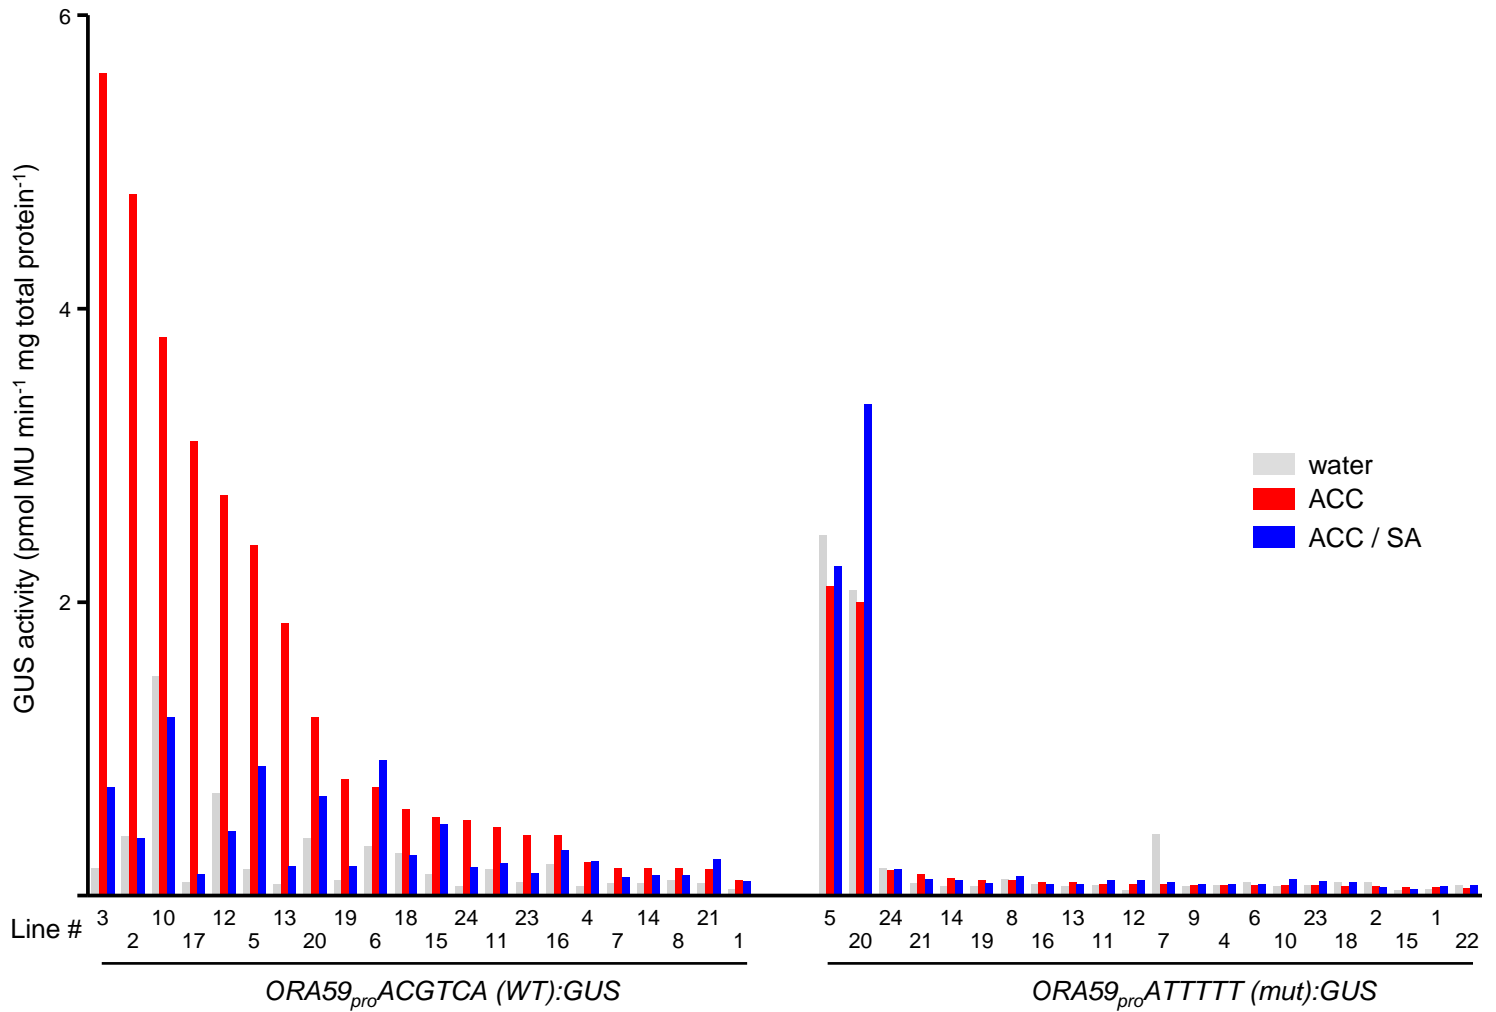

**Supplemental Figure S2.** GUS activities of independent transformants encoding the wild-type (WT) and the mutated *ORA59* promoter upstream of the *GUS* reporter gene

Plants (20 to 30 F2 plants per treatment and line) were sprayed with either water, 1 mM ACC or 1 mM ACC/1 mM SA and harvested after 24 h.

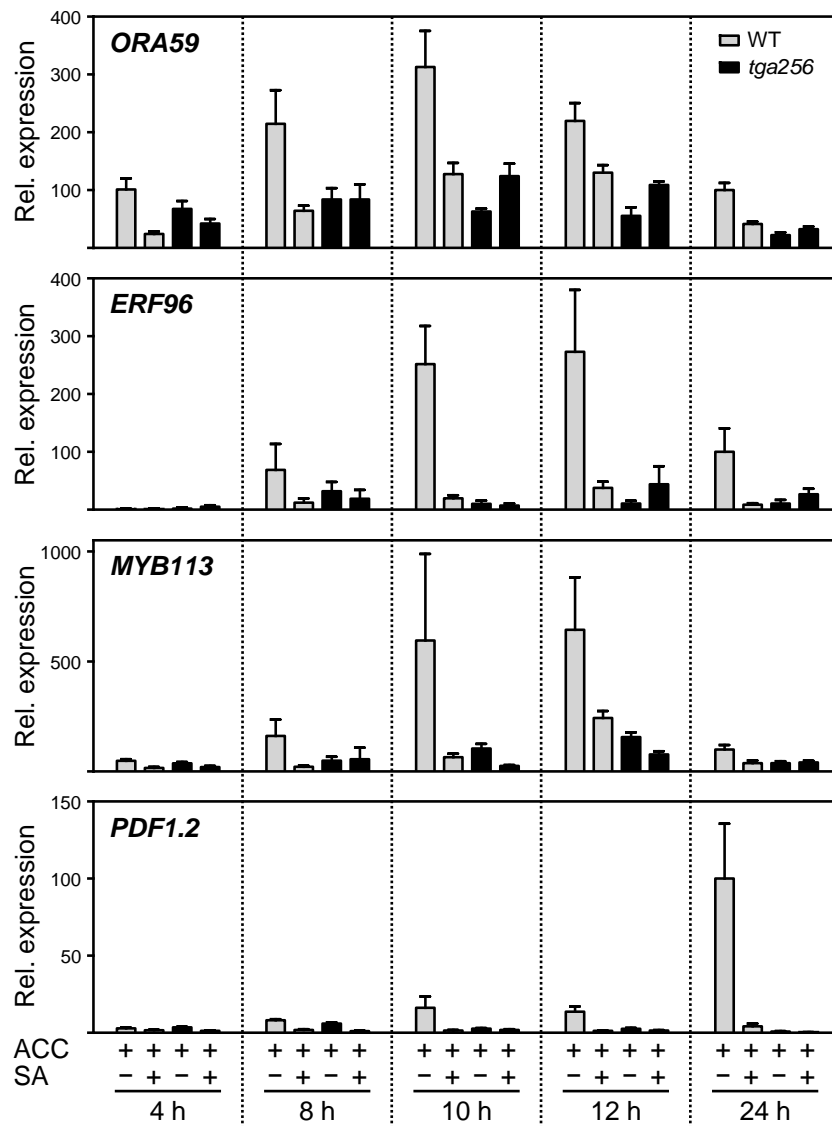

**Supplemental Figure S3.** Time-dependent expression analysis of selected transcription factors and *PDF1.2* in ACC- and ACC/SA-treated wild-type and *tga256* plants

Four-week old soil-grown wild-type (WT) and *tga256* were sprayed with 1 mM ACC or 1 mM ACC/1 mM SA and harvested after 4, 8, 10, 12, and 24 hours. The relative transcript levels of the indicated transcription factors and *PDF1.2* were determined by quantitative RT-PCR analysis. The relative expression values in wild-type plants after 24 h after ACC treatment were set to 100%. The mean values ( $\pm$ SE) of four to five biological replicates are shown.

**Supplemental Table S1: Primers for Genotyping, Cloning and ChIP Analyses**

| Abbr. | Description              | Sequence                                                        |
|-------|--------------------------|-----------------------------------------------------------------|
| P1    | ora59 GK-061A12_LP       | ATGCTGCAGACGGTAACAAAC                                           |
| P2    | ora59 GK-061A12_RP       | CTTCAAGCTCATGGAGCTCAC                                           |
| P3    | TGA25 fwd.               | GTCATCCGGTTTCATATTCTCCTC                                        |
| P4    | TGA25 rev.               | CCGCATAACAATAAACCAAGAGAG                                        |
| P5    | tga25 rev.               | GAGCGACAACCTCCTTTCAACTCATC                                      |
| P6    | TGA6 fwd.                | AAGCGGATAGGTGATCAGTG                                            |
| P7    | tga6 fwd.                | TTCTCACTTTGTGATTTGCCTTTGG                                       |
| P8    | TGA6 rev.                | TGGGCAATCTTGCTATGATTTCAAG                                       |
| P9    | ORA59-Pro. fwd.          | GGGACAAGTTTGTACAAAAAAGCAGGCTCCG<br>GATTGGTTGCAGGTTACGATG        |
| P10   | ORA59-Pro. rev.          | GGGACCACTTTGTACAAGAAAGCTGGGTCCG<br>ATTTTCGATCTTTTTTTTTTTCTTCTTG |
| P11   | pDONR fwd.               | ACGACGTTGTAAAACGACGGCCAG                                        |
| P12   | ORA59 TGACG overlap rev. | GGACAAGACCAGGTTGAGTGTA AAAAATACGG<br>CGGCGTATTCCCGAC            |
| P13   | ORA59 TGACG overlap fwd. | GTATTTTTTACACTCAACCTGGTCTTGTC                                   |
| P14   | pDONR rev.               | GTAACATCAGAGATTTTGAGACAC                                        |
| P15   | ACTIN8 ChIP fwd.         | GGTTTTCCCCAGTGTTGTTG                                            |
| P16   | ACTIN8 ChIP rev.         | CTCCATGTCATCCCAGTTGC                                            |
| P17   | ORA59 ChIP fwd.          | CGAGAGAGTATATGAAGAGGCCAA                                        |
| P18   | ORA59 ChIP rev.          | GGACAAGACCAGGTTGAGTG                                            |
| P19   | ERF96 ChIP fwd.          | TCTTTCATTATATAGAGGTGTCGAGGG                                     |
| P20   | ERF96 ChIP fwd.          | GCGTGTTTGTATGTGTTTGTGTATAGG                                     |

**Supplemental Table S2: Primers for Quantitative RT-PCR Analyses**

| Description    | Sequence / Order No.                                         |
|----------------|--------------------------------------------------------------|
| UBQ5 RT fwd.   | GACGCTTCATCTCGTCC                                            |
| UBQ5 RT rev.   | GTAACCGTAGGTGAGTCCA                                          |
| PDF1.2 RT fwd. | CTTGTTCTCTTTGCTGCTTTC                                        |
| PDF1.2 RT rev. | CATGTTTGGCTCCTTCAAG                                          |
| ORA59          | QuantiTect Primer Assay QT00852054 (Qiagen, Hilden, Germany) |
| ERF96          | QuantiTect Primer Assay QT00737828 (Qiagen, Hilden, Germany) |
| MYB113         | QuantiTect Primer Assay QT00887684 (Qiagen, Hilden, Germany) |
| ERF1           | QuantiTect Primer Assay QT00777777 (Qiagen, Hilden, Germany) |
| ATERF14        | QuantiTect Primer Assay QT00868315 (Qiagen, Hilden, Germany) |
| ATERF15        | QuantiTect Primer Assay QT00760648 (Qiagen, Hilden, Germany) |
| ERF9           | QuantiTect Primer Assay QT00738395 (Qiagen, Hilden, Germany) |
| ANAC032        | QuantiTect Primer Assay QT00743561 (Qiagen, Hilden, Germany) |

**Supplemental Table S3: Accession Numbers**

| Gene           | Accession Number |
|----------------|------------------|
| <i>UBQ5</i>    | <i>At3g62250</i> |
| <i>PDF1.2</i>  | <i>At5g44420</i> |
| <i>ORA59</i>   | <i>At1g06160</i> |
| <i>ERF96</i>   | <i>At5g43410</i> |
| <i>MYB113</i>  | <i>At1g66370</i> |
| <i>ERF1</i>    | <i>At3g23240</i> |
| <i>ATERF14</i> | <i>At1g04370</i> |
| <i>ATERF15</i> | <i>At2g31230</i> |
| <i>ERF9</i>    | <i>At5g44210</i> |
| <i>ACTIN8</i>  | <i>At1g49240</i> |
| <i>TGA2</i>    | <i>At5g06950</i> |
| <i>TGA5</i>    | <i>At5g06960</i> |
| <i>TGA6</i>    | <i>At3g12250</i> |
| <i>CTR1</i>    | <i>At5g03730</i> |
